# Supplementary material for: Complexes of Cationic Pyridylphenylene Dendrimers with Anionic Liposomes: The Role of Dendrimer Composition in Membrane Structural Changes
Source: MDPI journal article supplement (doi:10.3390/ijms24032225), 2023-01-22
Supplement: s1 [file s1]

# Complexes of Cationic Pyridylphenylene Dendrimers with Anionic Liposomes: The Role of Dendrimer's Composition in Membrane Structural Changes

Anna A. Efimova <sup>1</sup>, Svetlana A. Sorokina <sup>2</sup>, Kseniya S. Trosheva <sup>1</sup>, Alexander A. Yaroslavov <sup>1</sup> and Zinaida B. Shifrina <sup>2,\*</sup>

<sup>1</sup> Department of Chemistry, M.V. Lomonosov Moscow State University, 1-3 Leninskie Gory, 119991 Moscow, Russia

<sup>2</sup> A.N. Nesmeyanov Institute of Organoelement Compounds, Russian Academy of Sciences, 28 Vavilov St., 119991 Moscow, Russia

\* Correspondence: shifrina@ineos.ac.ru

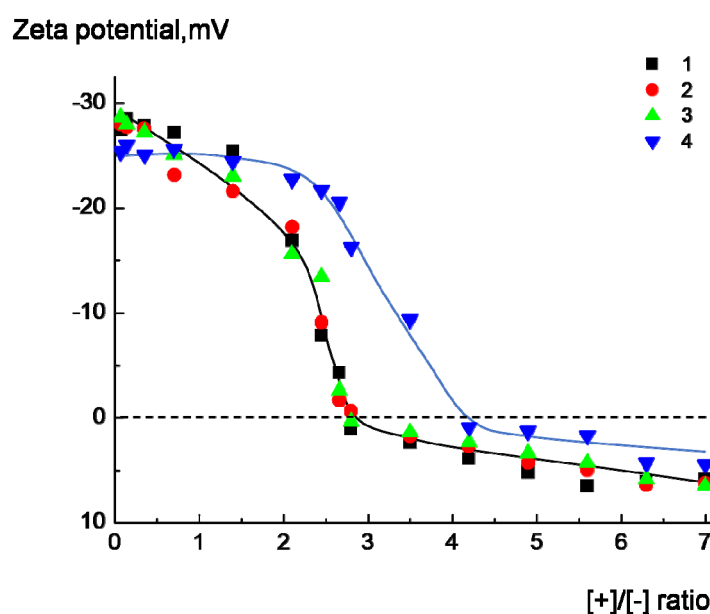

**Figure S1.** Zeta potential of the dendrimer - liposome complexes versus ratio of the ionic groups [+)/[-] for  $D_{3^{50+}}$ (1),  $D_{2^{29+}}$ (2),  $D_{2^{15+}}$ (3) and  $D_{1^{6+}}$ (4), where [+) is the molar concentration of pyridinium groups of the dendrimer and [-] is the molar concentration of negatively charged cardiolipin headgroups. CL/Chol/DOPC liposomes, [CL] =  $1.5 \times 10^{-4}$  mol/L, total lipid concentration 1 mg/mL.  $10^{-3}$  M phosphate buffer, pH 7.2.

|                      |          |
|----------------------|----------|
| Measurement Results: |          |
| Effective Diameter:  | 346.8 nm |
| Polydispersity:      | 0.081    |
| Baseline Index:      | 9.3      |

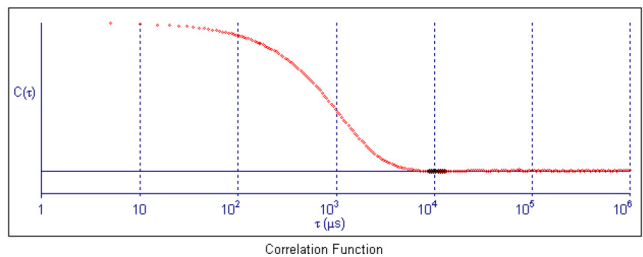

(1)

|                      |          |
|----------------------|----------|
| Measurement Results: |          |
| Effective Diameter:  | 992.0 nm |
| Polydispersity:      | 0.324    |
| Baseline Index:      | 5.7      |

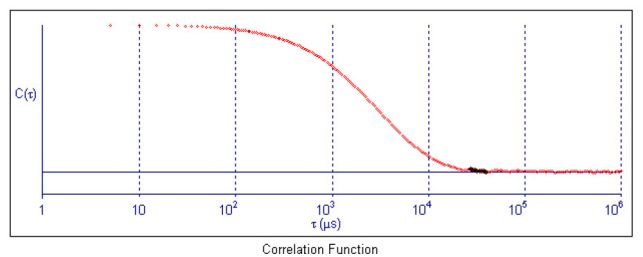

(2)

|                      |         |
|----------------------|---------|
| Measurement Results: |         |
| Effective Diameter:  | 73.4 nm |
| Polydispersity:      | 0.242   |
| Baseline Index:      | 7.3     |

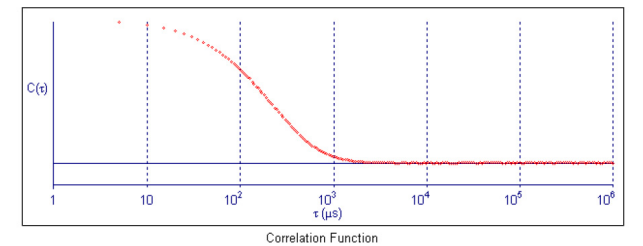

(3)

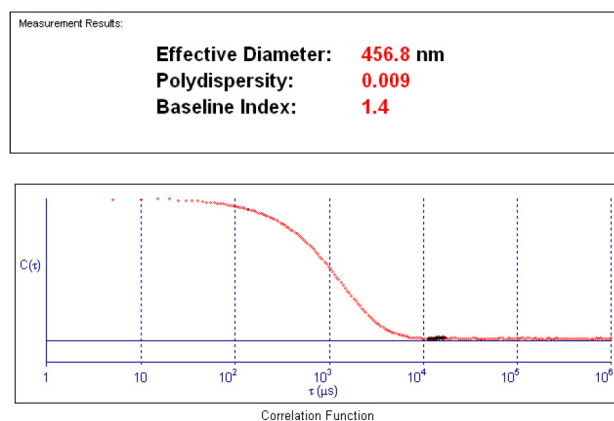

(4)

**Figure S2.** Examples of the experimental autocorrelation curves for dendrimer- liposome complexes for  $D_3^{50+}$ (1),  $D_2^{29+}$ (2),  $D_2^{15+}$ (3) and  $D_1^{6+}$ (4) with different ratio of the ionic groups  $[+]/[-]$ , where  $[+]$  is the molar concentration of pyridinium groups of the dendrimer and  $[-]$  is the molar concentration of negatively charged cardiolipin headgroups.  $[+]/[-]$ = 2.5 (1), 2.7 (2), 0.1 (3), 1.4 (4). CL/Chol/DOPC liposomes,  $[CL] = 1.5 \times 10^{-4}$  mol/L, total lipid concentration 1 mg/mL.  $10^{-3}$  M phosphate buffer, pH 7.2.
